# Supplementary material for: Genetic screens reveal mechanisms for the transcriptional regulation of tissue-specific genes in normal cells and tumors
Source: PubMed Central journal article supplement (PMC6468300; doi:10.1093/nar/gkz080), 2019-02-07
Supplement: gkz080_supplemental_file.pdf [file gkz080_supplemental_file.pdf]

**Supplemental material for Naciri et al.**

**“Genetic screens reveal mechanisms for the transcriptional regulation of  
tissue-specific genes in normal cells and tumors”**

**Contents :**

Supplemental Figure Legends

Supplemental Table Legends

Supplemental Figures S1-S7

Supplemental Tables 1-7

## Supplemental Figure Legends

### Supplemental Figure 1, Related to Figure 1.

(A) Validation of Nanostring probes with positive controls. The probes for each of the 42 tissue-restricted genes were tested on primary IMR90 cells (black dots), the transformed derivative SW39 cells (green dots), and on a positive control mRNA extracted from 10 mixed human cancer cell lines. The dotted line represents a 2-fold change over control. (B) Verification of kinase expression in the signaling screen: Nanostring counts of the Myr-Flag tag in non-infected cells (IMR90 or its transformed derivative SW39), and in cells infected by each of the 192 activated kinases (yellow dots). (C) Validation of siRNA efficiency on eight selected genes. Nanostring probes were used to measure the abundance of mRNA for each of the 8 indicated genes after transfection of siRNA pools targeting the gene in question (yellow bars), or transfection of non-targeting siRNA pools (green bars). Non-transfected cells are also included (black bars).

### Supplemental Figure 2, Related to Figure 2.

(A) Relative expression of ADAM12 and TAK1 in MRC5 primary lung fibroblasts after infection with viral vectors expressing either wild-type TAK1 or the catalytic dead TAK1 (TAK1 CD). The statistical analysis was performed with a one way ANOVA followed by a Dunnett's test except for mice experiment where Mann Whitney was performed (\*  $p < 0.05$ , \*\*  $p < 0.01$ , \*\*\*  $p < 0.001$ , \*\*\*\*  $p < 0.0001$ ). (B) RT-qPCR representing the relative expression of TGF- $\beta$  target genes in the presence or absence of TAK1 kinase inhibitor 5Z. MRC5 cells were pre-treated with 0.3  $\mu$ M 5Z or DMSO for two hours, followed by stimulation with 5ng/mL TGF- $\beta$  for six hours. (C) Western blot showing the phosphorylation of SMAD3 in MRC5 even under 5Z treatment. Tubulin (TUB) served as a loading control. (D) Western blotting on ADAM12 in whole cell extracts of tibialis muscles after the indicated treatments. CD71 is a loading control that underwent Concanavalin A enrichment, like ADAM12. MW: lane with the molecular weights. (E) Quantification of panel D was performed using Image Studio lite (Licor) with CD71 as a loading control. All experiments have been performed three times while mice experiments were conducted twice.

### Supplemental Figure 3, Related to Figure 3.

(A) RT-qPCR showing relative expression of ADAM12, KAT2A and SIRT6 in MRC5 cells transfected with siCtl (non-targeting siRNA), siKAT2A and/or siSIRT6 as indicated. These siRNAs are independent from the ones used in the screen. The statistical analysis was

performed employing a two-way two tailed ANOVA test followed by Dunnett's test. **(B)** Western blot analysis showing down regulation of KAT2A and SIRT6 after siRNA transfection in MRC5, Tubulin (TUB) was used as a loading control. **(C)** Western blot showing induction of the ADAM12 protein after siRNA against the indicated factors. All experiments were performed three times or more.

#### **Supplemental Figure 4, Related to Figure 4.**

Primary lung fibroblast IMR90 **(A)** and MRC5 **(B)** were transfected with siCtrl or siKAT2A and treated every day with 0.3 $\mu$ M 5Z or DMSO for 3 days. RT-qPCR shows relative expression of ADAM12 and KAT2A. The statistical analysis was performed with a one way ANOVA test followed by a Dunnett's test. All experiments were performed three times or more.

#### **Supplemental Figure 5, Related to Figure 5.**

**(A)** RT-qPCR showing relative expression of ADAM12 after treatment of BT549 cells with the TAK1 inhibitor 5Z at 0.3  $\mu$ M concentration for 4 days. The statistical analysis was performed with a one way two ANOVA test followed by a Dunnett's test. **(B)** Western blot showing ADAM12 expression after 5Z treatment in BT549. For ADAM12, concanavalin A enrichment was performed. **(C)** Co-immunoprecipitation of endogenous TAK1 from SUM159PT after cellular fractionation revealed interaction with KAT2A in the cytoplasm and the nucleus. TAB1, co-factor of TAK1 served as a positive control. Histone H3 was used as a marker of the nuclear compartment, and tubulin as a marker of the cytoplasmic compartment.

#### **Supplemental Figure 6, Related to Figure 6.**

Co-immunoprecipitation of endogenous TAK1 from MDA-MB-231 cell line reveals interaction with KAT2A.

#### **Supplemental Figure 7, Related to Figure 7.**

**(A)** Random sampling procedure to test the validity of the TAK1 signature. **(B)** ADAM12 expression in lung tumors and normal lung from the TCGA database. The boxplots contain 50% of the values, with a notch at the median value, and a diamond at the average value. The whiskers depict the first and last quartiles, and outliers appear as black dots. **(C)** ADAM12, KAT2A, TAK1 expression in normal lung tissue and a subset of lung tumors, selected based

on their low (1st decile, green) or high (9th decile, red) ADAM12 expression. **(D)** Unsupervised clustering of lung tumors according to the TAK1 signature almost perfectly segregates tumors according to ADAM12 expression. **(E)** ADAM12 expression in colon cancer samples and normal colon tissue samples from the TCGA database. **(F)** ADAM12, KAT2A, TAK1 expression in normal colon tissue and a subset of colon tumors, selected based on their low (1st decile, green) or high (9th decile, red) ADAM12 expression. **(G)** Unsupervised clustering of colon tumors according to the TAK1 signature almost perfectly segregates tumors according to ADAM12 expression. **(H)** TAK1-activation score versus ADAM12 or KAT2A mRNA expression in lung cancer samples from TCGA database. The statistical analysis was performed employing a one way ANOVA test, following by a Tukey HSD test (\*\*\*) denotes  $p < 0.001$ ). **(I)** As in panel H, but on colon tumors.

### **Supplemental Table Legends**

Table S1: List of 192 activated kinases used in the signaling screen.

Table S2: List and target sequence of 72 Nanostring probes.

Table S3: List and characteristics of 42 tissue-restricted genes analyzed in the screens.

Table S4: List of 160 chromatin regulators targeted in the siRNA screen.

Table S5: Sequence of qRT-PCR primers used.

Table S6: Sequence of siRNAs used.

Table S7: List of 190 genes constituting the TAK1 signature.

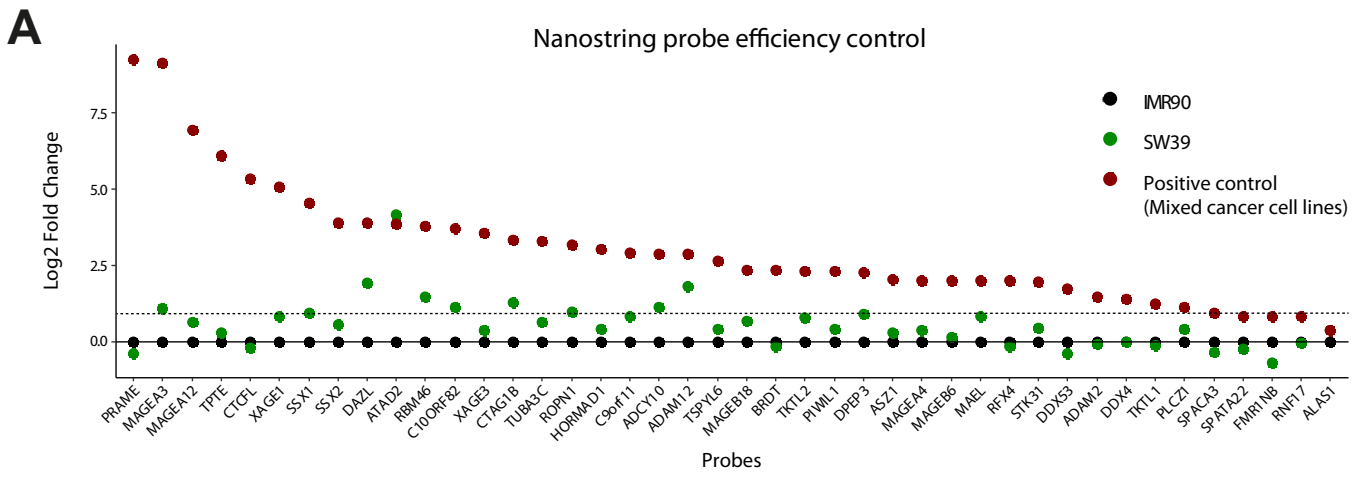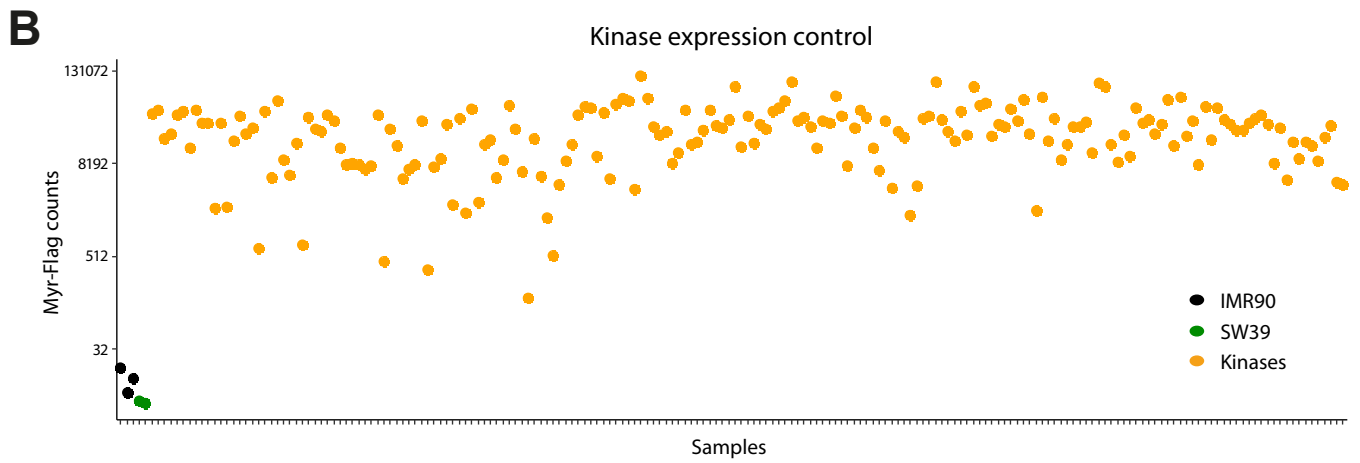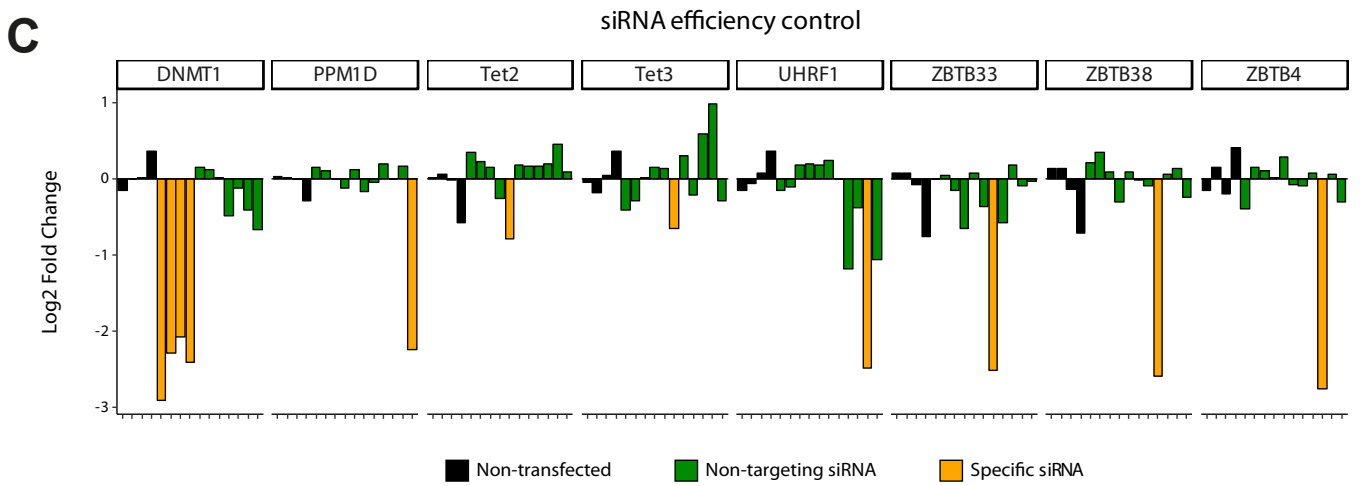

**Figure S1**  
Naciri et al.

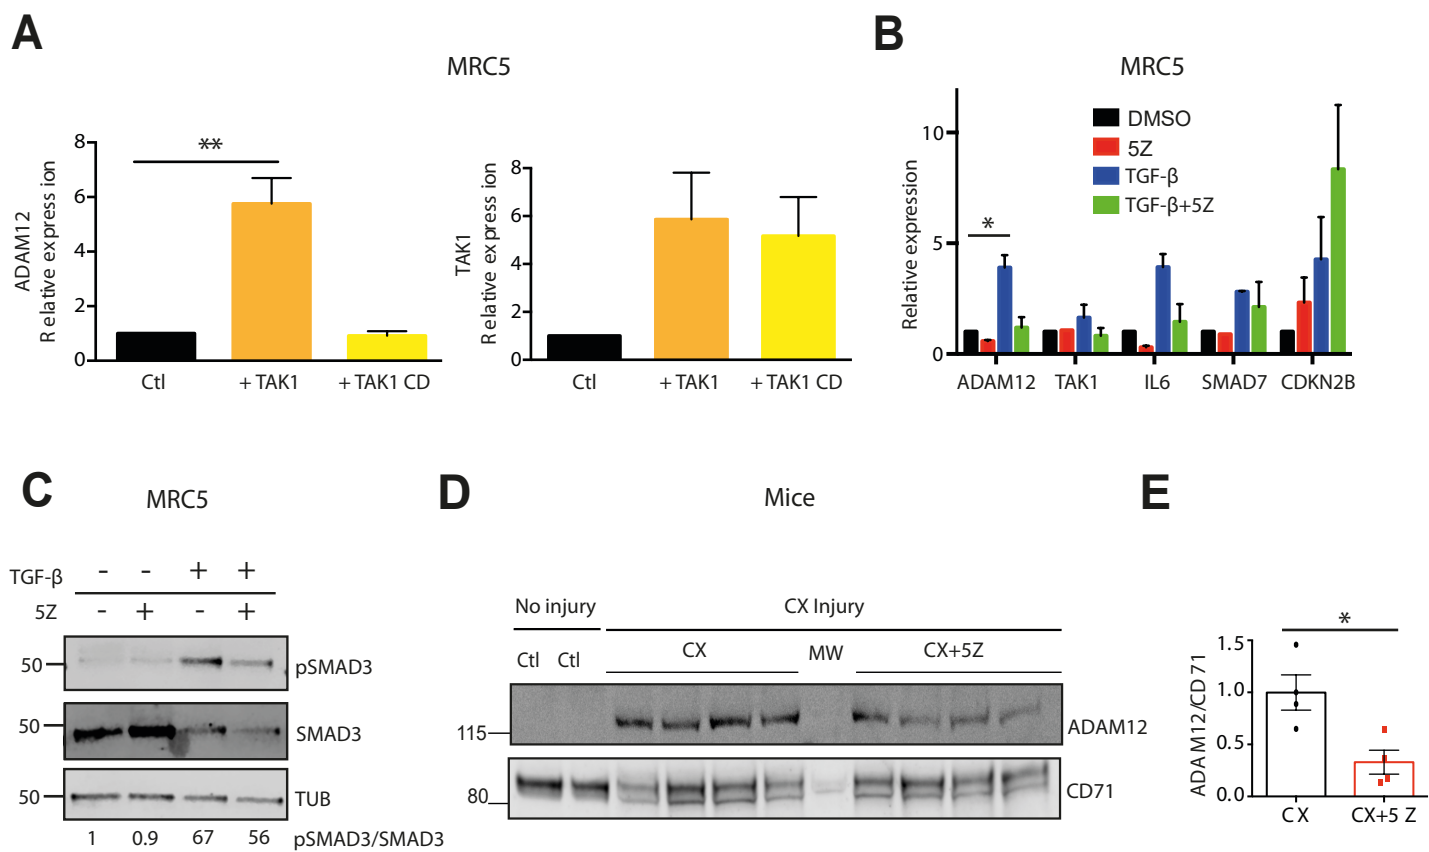

**Figure S2**  
Naciri et al.

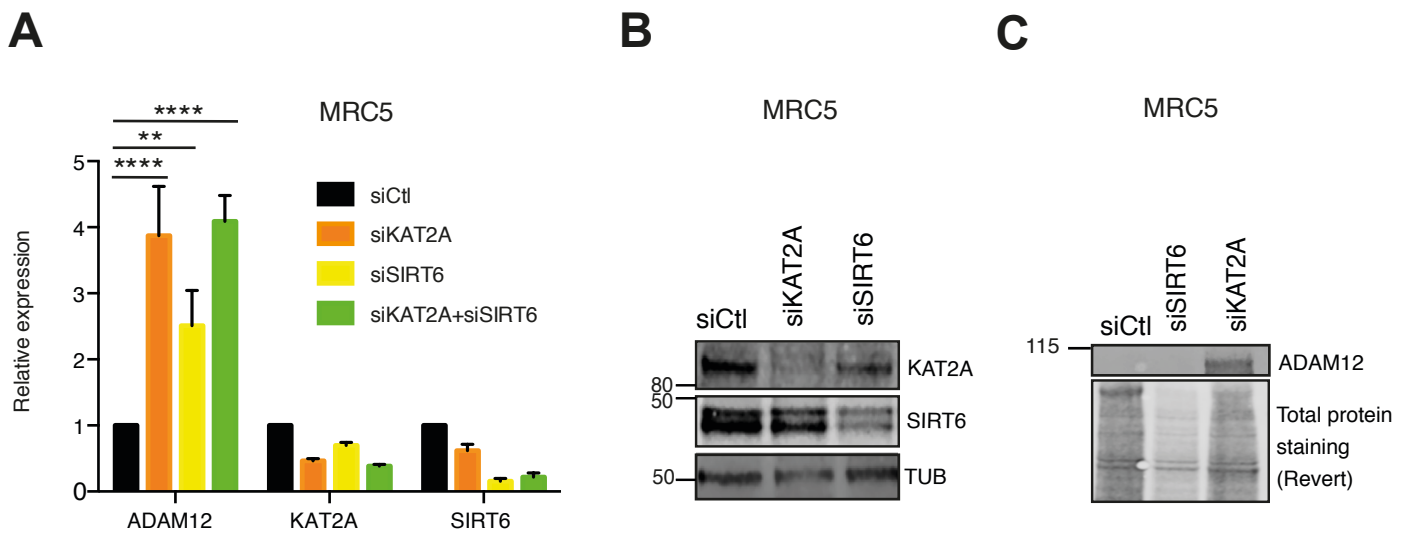

**Figure S3**  
Naciri et al.



**A**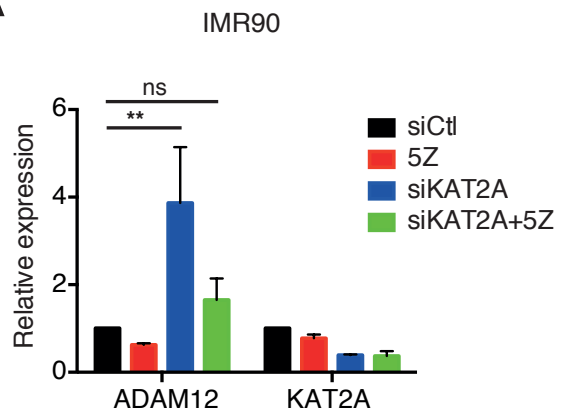**B**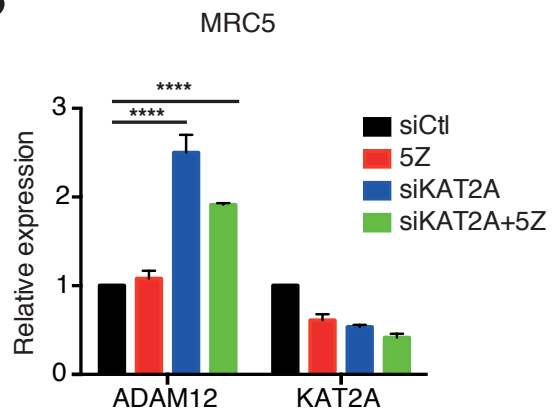

**Figure S4**  
**Naciri et al.**

**A**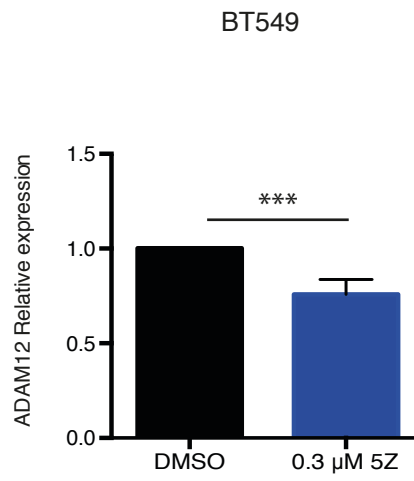**B**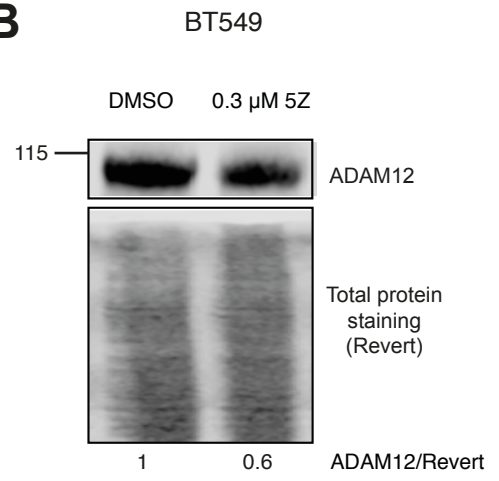**C**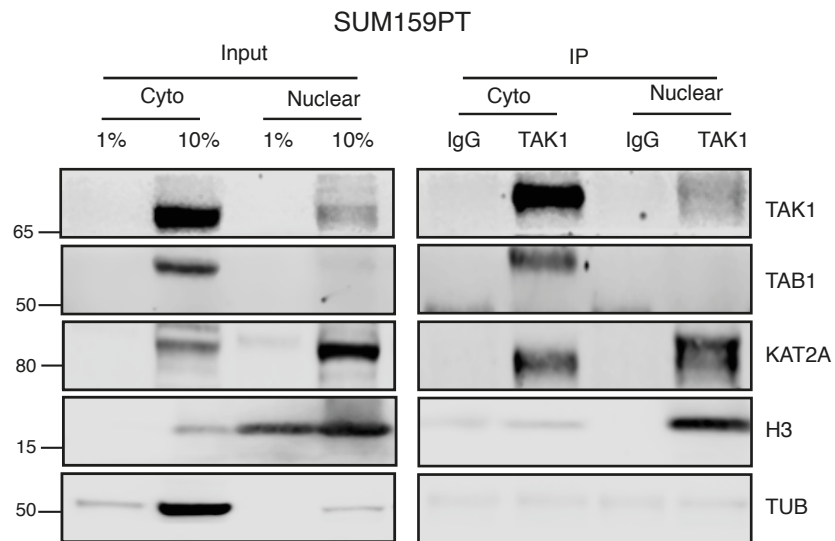

**Figure S5**  
Naciri et al.

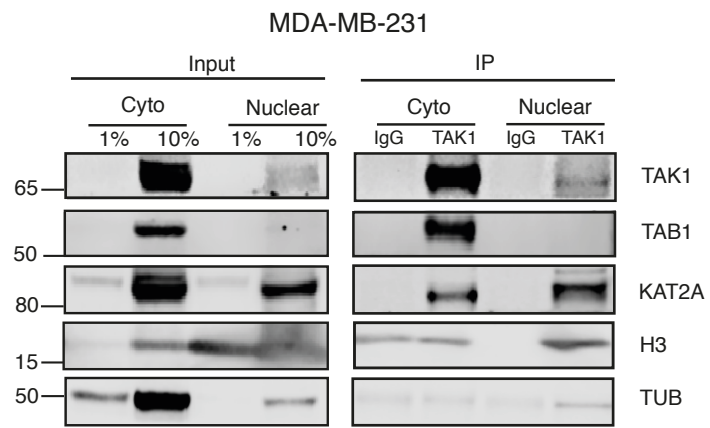

**Figure S6**  
**Naciri et al.**

**A**

Randomly pick up a control set of 190 genes

Calculate the associated score,  
as for TAK1 signatureCompute correlation  
with ADAM12 and KAT2A expressions**x 1000**  
→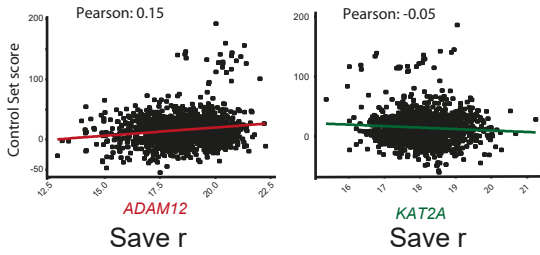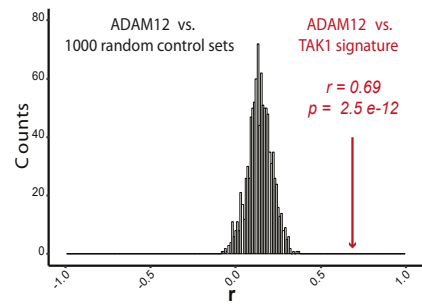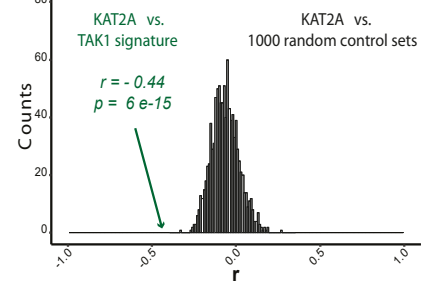**B**Lung samples  
(All)

ADAM12

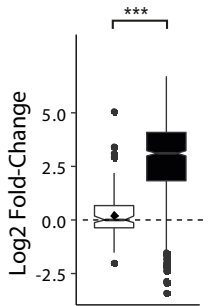

□ Normal (110)  
■ Tumors (1044)

**C**

Lung samples (subset)

ADAM12 KAT2A TAK1

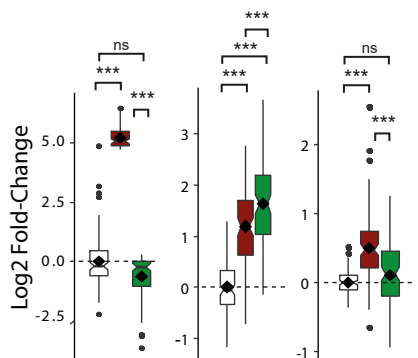

□ Normal (110)  
■ High-A12 (105) ■ Low-A12 (105)

**D**

Lung samples (subset)

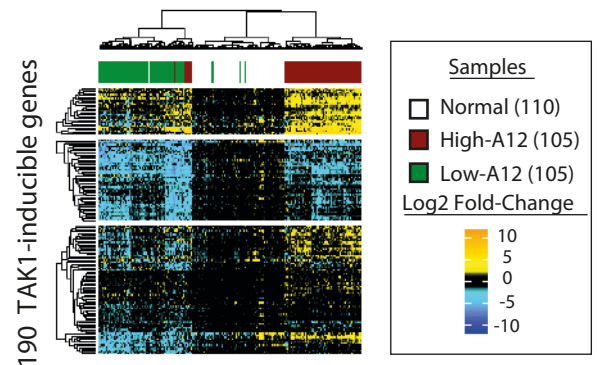**E**Colon samples  
(All)

ADAM12

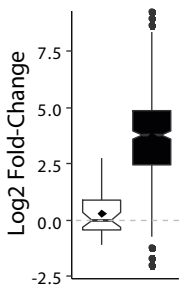

□ Normal (41)  
■ Tumors (505)

**F**

Colon samples (subset)

ADAM12 KAT2A TAK1

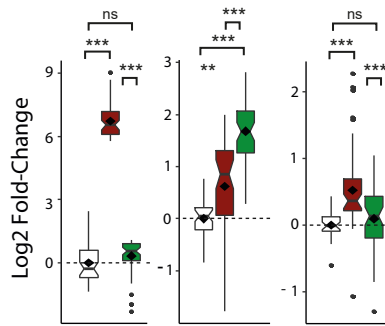

□ Normal (41)  
■ High-A12 (51) ■ Low-A12 (51)

**G**

Colon samples (subset)

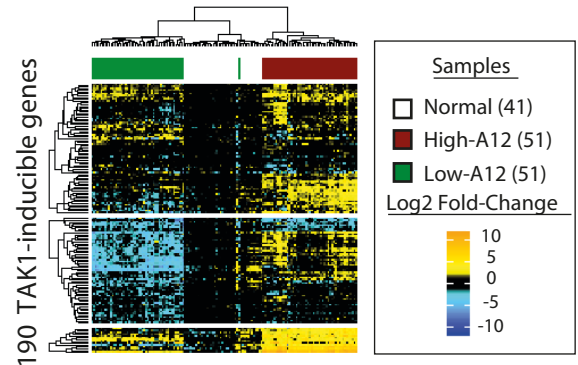**H**

Lung tumors (All)

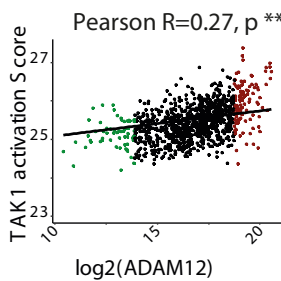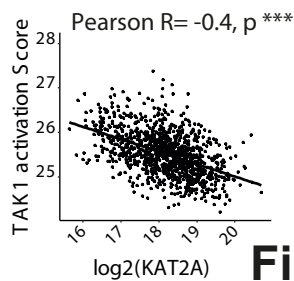**I**

Colon tumors (All)

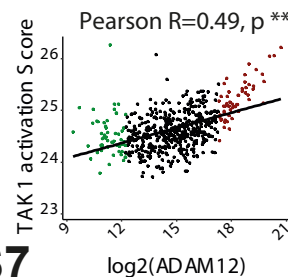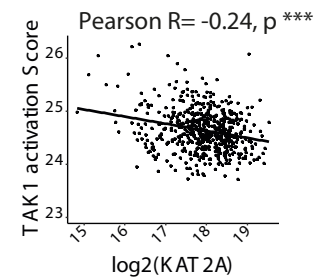

**Figure S7**  
**Naciri et al.**

**Table S1 : List of the kinases used in the screen**

192 kinases genetically activated by addition of Myristoylation sequence

All in pBabe vector (Hahn/Zhao; Addgene#1000000012)

|        |          |         |         |         |         |
|--------|----------|---------|---------|---------|---------|
| AAK1   | CKMT1A   | HK1     | MVK     | PIP5K1B | RPS6KL1 |
| ACVR1  | CKMT2    | HK2     | NADK    | PIP5K2A | RPSK6A3 |
| ADCK4  | CKS1B    | HK3     | NEK11   | PIP5K3  | SGK     |
| ADCK5  | CKS2     | IHPK2   | NEK3    | PKM2    | SNF1LK  |
| ADPGK  | CLK1     | IKBKE   | NEK6    | PKN1    | SPHK2   |
| ADRBK1 | CLK2     | ILK     | NME7    | PKN2    | SRPK2   |
| ADRBK2 | CLK3     | ITK     | NTRK3   | PLAU    | STK17B  |
| AKT1   | CMPK     | ITPK1   | NUAK2   | PLK1    | STK3    |
| AKT3   | CSNK1A1L | ITPKB   | OXSRI   | PLK2    | STK32A  |
| AMHR2  | CSNK1E   | LCK     | PACIN1  | PLK3    | STK32B  |
| AURKA  | CSNK1G1  | LIMK1   | PAK4    | PLK4    | STK32C  |
| AXL    | CSNK1G2  | LIMK2   | PAPSS1  | PMVK    | STK33   |
| BLK    | DAK      | MAP2K5  | PBK     | PNKP    | STK38L  |
| BMX    | DGKG     | MAP2K6  | PCK2    | PRKAA1  | STK4    |
| BTK    | DGUOK    | MAP2K7  | PCTK1   | PRKACB  | STK40   |
| CALM2  | DLG5     | MAP3K14 | PCTK2   | PRKACG  | SYK     |
| CAMK1G | DYRK2    | MAP3K6  | PCTK3   | PRKAG2  | TAOK3   |
| CAMK2B | DYRK4    | MAP3K7  | PDIK1L  | PRKAR2A | TBK1    |
| CAMK2D | EPHA4    | MAP3K8  | PDK1    | PRKCD   | TEC     |
| CAMK4  | FASTK    | MAPK12  | PDPK1   | PRKCI   | TESK1   |
| CAMKK1 | FGFR1    | MAPK13  | PDXK    | PRKCZ   | TIE1    |
| CAMKV  | FGR      | MAPK14  | PFKL    | PRKRA   | TK1     |
| CDC2   | FRK      | MAPK6   | PFKM    | PTK2    | TNK2    |
| CDK2   | GAK      | MAPK7   | PI4K2B  | RET     | TSSK1B  |
| CDK4   | GALK2    | MAPKAP1 | PIK3CB  | RIOK1   | TSSK6   |
| CDK5   | GCK      | MAST1   | PIK3CG  | RIOK2   | TTK     |
| CDK7   | GK       | MATK    | PIK3R3  | RIOK3   | TYK2    |
| CDK9   | GK2      | MELK    | PIK3R5  | RPS6KA2 | UCK2    |
| CERK   | GRK5     | MKNK1   | PIK4CA  | RPS6KA5 | ULK4    |
| CHEK1  | GRK6     | MOBK1A  | PIK4CB  | RPS6KA6 | VRK2    |
| CKB    | HCK      | MOBK2A  | PIM1    | RPS6KB1 | VRK3    |
| CKM    | HIPK1    | MPP1    | PIP5K1A | RPS6KB2 | YES1    |



**Table S3 : List of tissue-restricted genes analyzed**

|    | Gene     | Tissue with highest expression | Cancer/Testis Antigen? | CpG island? | CpG island methylated in IMR90? |
|----|----------|--------------------------------|------------------------|-------------|---------------------------------|
| 1  | ADAM12   | Placenta                       | No                     | Yes         | Partially                       |
| 2  | ADAM2    | Testis                         | Yes                    | No          |                                 |
| 3  | ADCY10   | Testis                         | No                     | No          |                                 |
| 4  | ALAS1    | Adrenal Gland/Liver            | No                     | Yes         | No                              |
| 5  | ASZ1     | Testis                         | Yes                    | Yes         | Yes                             |
| 6  | ATAD2    | Testis/Bone marrow             | Yes                    | Yes         | No                              |
| 7  | BRDT     | Testis                         | Yes                    | Yes         | Yes                             |
| 8  | C10ORF82 | Testis                         | No                     | Yes         | Partially                       |
| 9  | C9orf11  | Testis                         | No                     | No          |                                 |
| 10 | CTAG1B   | Testis                         | Yes                    | No          |                                 |
| 11 | CTCF     | Testis                         | Yes                    | Yes         | Yes                             |
| 12 | DAZL     | Testis                         | No                     | Yes         | Yes                             |
| 13 | DDX4     | Testis                         | No                     | Yes         | Yes                             |
| 14 | DDX53    | Testis                         | Yes                    | No          |                                 |
| 15 | DPEP3    | Testis                         | No                     | Yes         | Yes                             |
| 16 | FMR1NB   | Testis                         | Yes                    | Yes         | Yes                             |
| 17 | HORMAD1  | Testis                         | Yes                    | No          |                                 |
| 18 | MAEL     | Testis                         | Yes                    | Yes         | Yes                             |
| 19 | MAGEA12  | Testis                         | Yes                    | No          |                                 |
| 20 | MAGEA3   | Testis                         | Yes                    | Yes         | No data                         |
| 21 | MAGEA4   | Testis                         | Yes                    | No          |                                 |
| 22 | MAGEB18  | Testis                         | Yes                    | No          |                                 |
| 23 | MAGEB6   | Testis                         | Yes                    | No          |                                 |
| 24 | PIWIL1   | Testis                         | Yes                    | Yes         | Yes                             |
| 25 | PLCZ1    | Testis                         | No                     | No          |                                 |
| 26 | PRAME    | Testis                         | Yes                    | Yes         | Yes                             |
| 27 | RBM46    | Testis                         | Yes                    | Yes         | Yes                             |
| 28 | RFX4     | Testis                         | No                     | Yes         | No                              |
| 29 | RNF17    | Testis                         | No                     | No          |                                 |
| 30 | ROPN1    | Testis                         | Yes                    | Yes         | No data                         |
| 31 | SPACA3   | Testis                         | Yes                    | No          |                                 |
| 32 | SPATA22  | Testis                         | No                     | Yes         | Yes                             |
| 33 | SSX1     | Testis                         | Yes                    | No          |                                 |
| 34 | SSX2     | Testis                         | Yes                    | No          |                                 |
| 35 | STK31    | Testis                         | No                     | No          |                                 |
| 36 | TKTL1    | Testis                         | No                     | Yes         | Yes                             |
| 37 | TKTL2    | Testis                         | No                     | Yes         | Yes                             |
| 38 | TPTE     | Testis                         | Yes                    | Yes         | Yes                             |
| 39 | TSPYL6   | Testis                         | No                     | Yes         | Yes                             |
| 40 | TUBA3C   | Testis                         | No                     | No          |                                 |
| 41 | XAGE1    | Testis                         | Yes                    | No          |                                 |
| 42 | XAGE3    | Placenta                       | Yes                    | No          |                                 |

**Table S4. List of 160 chromatin regulators targeted in the siRNA screen.**

|        |       |          |          |
|--------|-------|----------|----------|
| ARID1A | HDAC2 | MBD6     | SMARCA1  |
| ASF1A  | HDAC3 | MECP2    | SMARCA2  |
| ASH1L  | HDAC4 | MEIS1    | SMARCA4  |
| ATRX   | HDAC5 | MPHOSPH8 | SMARCA5  |
| AZI2   | HDAC6 | PBRM1    | SMARCB1  |
| BMI1   | HDAC7 | PCGF1    | SMARCC1  |
| BPTF   | HDAC8 | PCGF2    | SMARCC2  |
| BRD1   | HMGB1 | PCGF3    | SMARCD1  |
| BRD2   | HMGB3 | PCGF5    | SMARCD2  |
| BRD3   | HOXA5 | PCGF6    | SMCHD1   |
| BRD4   | INO80 | PHC1     | SUV39H1  |
| BRD7   | KAT2A | PHC2     | SUV420H1 |
| BRD8   | KAT2B | PHF8     | SUV420H2 |
| CBX1   | KAT6A | PPM1D    | SUZ12    |
| CBX3   | KAT6B | PRDM2    | TDG      |
| CBX5   | KDM1A | PRMT1    | TET2     |
| CBX6   | KDM1B | PRMT5    | TET3     |
| CBX7   | KDM2A | RBBP4    | TRIM24   |
| CDYL   | KDM2B | RBBP7    | TRIM28   |
| CDYL2  | KDM3A | RCOR1    | TRIM33   |
| CHD1   | KDM3B | REST     | UHRF1    |
| CHD3   | KDM4A | RING1    | UHRF2    |
| CHD4   | KDM4C | RNF2     | WTAP     |
| CHD6   | KDM4D | RXRA     | YTHDC1   |
| CHD8   | KDM4E | SCAPER   | YTHDF1   |
| CTBP1  | KDM5A | SCMH1    | YTHDF2   |
| CTBP2  | KDM5B | SETD1A   | YTHDF3   |
| DICER1 | KDM5C | SETD1B   | ZBTB17   |
| DLX5   | KDM6B | SETD2    | ZBTB33   |
| DNMT1  | KLF5  | SETD7    | ZBTB38   |
| DNMT3A | KMT2A | SETD8    | ZBTB4    |
| DNMT3B | KMT2C | SETDB1   | ZBTB40   |
| EED    | KMT2E | SETDB2   | ZBTB44   |
| EHMT2  | LMNA  | SIN3A    | ZCCHC7   |
| ELP3   | LMNB2 | SIRT1    | ZHX1     |
| EZH1   | MBD1  | SIRT2    | ZHX2     |
| EZH2   | MBD2  | SIRT3    | ZNF114   |
| HAT1   | MBD3  | SIRT6    | ZNF217   |
| HDAC1  | MBD4  | SIRT7    | ZNF416   |
| HDAC11 | MBD5  | SMAD4    | ZNF695   |



**Table S5. List of qRT-PCR primers.**

| <b>Genes</b>              | <b>Forward primers</b>  | <b>Reverse primers</b> |
|---------------------------|-------------------------|------------------------|
| <b>ADAM12</b>             | AGCTTATGGAACCAAGGAAGAG  | CAGTTCTTTGCTTTCCCGTTG  |
| <b>TAK1</b>               | CGTCGGAAACCCTTTGATG     | CGCTGGGAAGGATCTTTAGAC  |
| <b>KAT2A</b>              | CTGTGCTGTCACCTCGAATG    | TCGGCGTAGGTGAGGAAGTA   |
| <b>SIRT6</b>              | CAGAGCTCCACGGGAACAT     | ACGACTGTGTCTCGGACGTA   |
| <b>IL6</b>                | GCCAGAGCTGTGCAGATGA     | ATGTCCTGCAGCCACTGGT    |
| <b>SMAD7</b>              | CAGATTCCCAACTTCTTCTGGAG | GTAGAGCCTCCCCACTCTCG   |
| <b>CDKN2B</b>             | CGTTAAGTTTACGGCCAACG    | GCATGCCCTTGTCTCCTC     |
| <b>Housekeeping genes</b> |                         |                        |
| <b>TBP</b>                | TGGCCCATAGTGTCTTTGC     | TCCTAGAGCATCTCCAGCACA  |
| <b>PGK1</b>               | AGGATAAAGTCAGCCATGTGAG  | CACAGGAACTAAAAGGCAGGA  |

**Table S6: Sequence of siRNAs**

| <b>Genes</b>            | <b>Target sequences</b>                                                                  |
|-------------------------|------------------------------------------------------------------------------------------|
| <b>KAT2A pool</b>       | AGGACAAAUUGGUGCCCGA<br>GUUCCUGGCAUUCGAGAGA<br>GCUACUACGUGACCCGGAA<br>ACUCAUGUCUUUGGGCGAA |
| <b>KAT2A individual</b> | CCAAGCAGGUCUAUUUCUACC                                                                    |
| <b>SIRT6 pool</b>       | CCAAGUGUAAGACGCAGUA<br>GUACAUCGCUGCAGAUCCG<br>CCAAAAGGUGAAGGCCAA<br>GAACUGGCGAGGCUGGUCU  |
| <b>SIRT6 individual</b> | CCGGCUCUGCACCGUGGCUAAGG                                                                  |
| <b>TAK1 pool</b>        | GGACAUUGCUUCUACAAU<br>GAGUGAAUCUGGACGUUUA<br>GGAAAGCGUUUAUUGUAGA<br>GCAAUGAGUUGGUGUUUAC  |
| <b>TAK1 individual</b>  | UGGCUUAUCUUACACUGGA                                                                      |

**Table S7: List of genes in the TAK1 signature**

|    |          |         |           |          |          |           |         |
|----|----------|---------|-----------|----------|----------|-----------|---------|
| 1  | ABCA1    | CTGF    | HBEGF     | LRP4     | P3H2     | SLC35F2   | UBASH3B |
| 2  | ADAM12   | CTPS1   | HECTD2    | LRR32    | P4HA3    | SLC38A5   | UBL3    |
| 3  | ADAM19   | DACT1   | HIVEP2    | MAP3K4   | PAG1     | SLC46A3   | UCK2    |
| 4  | ADAMTS4  | DCBLD1  | HMCN1     | MAP3K7CL | PDGFA    | SMAD7     | VAV3    |
| 5  | AMIGO2   | DGKI    | HS3ST3B1  | MEX3B    | PGM2L1   | SMURF1    | VDR     |
| 6  | ANGPTL4  | DKK1    | HTR1F     | MFAP3L   | PHLDA1   | SNAI1     | XYLT1   |
| 7  | ANKRD44  | DNAJB5  | IER3      | MIR181A2 | PHLDB1   | SNORD56B  | ZBTB21  |
| 8  | APCDD1L  | DRP2    | IER3      | MIR181B1 | PKIA     | SOCS6     | ZNF175  |
| 9  | ARHGEF40 | DUSP6   | IER3      | MIR181B2 | PLEK2    | SORBS2    | ZNF281  |
| 10 | ATP10A   | E2F7    | IFNE      | MIR218-1 | PLPP4    | SPDL1     | ZNF365  |
| 11 | B4GALT1  | EDN1    | IGF2BP3   | MIR221   | PLXDC2   | SPHK1     |         |
| 12 | BHLHE40  | EGR2    | IL11      | MIR222   | PMEP1    | SRPX2     |         |
| 13 | BMP2     | ELN     | IL6       | MIR31    | PNMA1    | ST6GAL2   |         |
| 14 | BMPR1B   | EPHB2   | INHBA     | MIR31HG  | PNP      | STARD13   |         |
| 15 | BMPR2    | ERBB4   | ITGA2     | MIR503   | PODXL    | STK38L    |         |
| 16 | BPGM     | ESM1    | ITGB6     | MIR503HG | PRDM1    | SYT14     |         |
| 17 | BTBD11   | ETV6    | IVNS1ABP  | MLXIP    | PRICKLE2 | TCF4      |         |
| 18 | C4orf26  | FAM57A  | JADE3     | MSC      | PTGS2    | TGFBI     |         |
| 19 | C5orf46  | FAP     | JUNB      | MURC     | RASD2    | TMC7      |         |
| 20 | CCIN     | FMNL3   | KCNJ15    | MYOZ1    | RASL11B  | TMEM2     |         |
| 21 | CDC42SE1 | FNDC1   | KDR       | NCF2     | RELT     | TMEM51    |         |
| 22 | CDH2     | FOXP1   | KLF10     | NEDD9    | RHOB     | TNFAIP6   |         |
| 23 | CDK17    | FRMD6   | LAMC2     | NFATC2   | SCX      | TNFAIP8L3 |         |
| 24 | CHRNA9   | FSTL3   | LEF1      | NNMT     | SCX      | TNS1      |         |
| 25 | CHST11   | FZD8    | LHFPL2    | NOX4     | SEMA7A   | TPM1      |         |
| 26 | CNIH3    | GALNT10 | LIMS1     | NREP     | SERPINE1 | TRIB1     |         |
| 27 | COL4A1   | GFPT2   | LINC00312 | NRP2     | SH3PXD2A | TSHZ3     |         |
| 28 | COL4A2   | GLIS3   | LMCD1     | NRP2     | SKIL     | TSPAN13   |         |
| 29 | COMP     | GPAM    | LOC79160  | OLFM2    | SLC19A2  | TSPAN2    |         |
| 30 | CPN2     | GPR183  | LRIG1     | OLFML2B  | SLC25A32 | UACA      |         |
